# Supplementary material for: Association of vitamins, minerals, and lead with lipoprotein(a) in a cross-sectional cohort of US adults
Source: Atypon-hosted journal article supplement (doi:10.1024/0300-9831/a000709), 2021-05-24
Supplement: 0300-9831_a000709_esm1.pdf [file 0300-9831_a000709_esm1.pdf]

**Electronic Supplementary Material 1**

**Table E1.** Population characteristics of included (n=7,662) vs. excluded (n=1,462) sample

| Covariate                           | Median (IQR) or percent (included sample) | Median (IQR) or percent (excluded sample) | p-value <sup>a</sup> |
|-------------------------------------|-------------------------------------------|-------------------------------------------|----------------------|
| Age (years)                         | 42 (29, 62)                               | 46 (29, 72)                               | 0.004**              |
| Missing (%)                         | -                                         | 0.0%                                      |                      |
| Female (%)                          | 57.5%                                     | 51.3%                                     | 0.006**              |
| Missing (%)                         | -                                         | 0.0%                                      |                      |
| Race                                |                                           | 0.0%                                      | 0.03*                |
| Non-Hispanic White                  | 38.5%                                     | 36.3%                                     |                      |
| Non-Hispanic Black                  | 30.3%                                     | 30.4%                                     |                      |
| Mexican American                    | 26.4%                                     | 28.9%                                     |                      |
| Other                               | 4.8%                                      | 4.5%                                      |                      |
| Missing (%)                         | -                                         | 0.0%                                      |                      |
| BMI                                 | -                                         | -                                         | 0.10                 |
| >18 kg/m <sup>2</sup>               | 1.4%                                      | 2.8%                                      |                      |
| 18-25 kg/m <sup>2</sup>             | 37.8%                                     | 40.7%                                     |                      |
| >25 kg/m <sup>2</sup>               | 60.8%                                     | 55.8%                                     |                      |
| Missing (%)                         | -                                         | 0.7%                                      |                      |
| Diabetes (%)                        | 7.7%                                      | 9.9%                                      | 0.03*                |
| Missing (%)                         | -                                         | 0.1%                                      |                      |
| Hypertension (%)                    | 26.8%                                     | 30.6%                                     | 0.07                 |
| Missing (%)                         | -                                         | 4.8%                                      |                      |
| eGFR (ml/min /1.73m <sup>2</sup> )  | 75 (64, 87)                               | 62 (0, 81)                                | <.001***             |
| Missing (%)                         | -                                         | 1.0%                                      |                      |
| Taking Statin (%)                   | 1.3%                                      | 1.0%                                      | 0.86                 |
| Missing (%)                         | -                                         | 0.0%                                      |                      |
| Active smoker                       | 26.8%                                     | 24.6%                                     | 0.84                 |
| Missing (%)                         | -                                         | 7.6%                                      |                      |
| Percent Calories from Saturated Fat | 10.5 (8.1, 13.0)                          | 10.5 (8.0, 13.2)                          | 0.13                 |
| Missing (%)                         | -                                         | 37.2%                                     |                      |
| Grams of Alcohol per Day            | 0 (0, 0)                                  | 0 (0,0)                                   | <.001                |
| Missing (%)                         | -                                         | 37.2%                                     |                      |

1. Abbreviations: BMI = Body Mass Index; eGFR = estimated glomerular filtration rate; IQR = interquartile range

2. Note: Somers D (continuous variables) or  $\chi^2$  (categorical variables) p-value compared to included sample; \* = <0.05; \*\* = <0.01; \*\*\* = <0.001

<sup>a</sup> p-value are adjusted for complex survey design and population weights

**Table E2.** Associations between control variables with Lp(a) and LDL-C in univariate, multivariate, and multivariate with interaction term models when excluding samples with Lp(a)=0

|                                        | Model 1 - univariate |               |           | Model 2 - multivariate |              |           | Model 3 - multivariate with Interactions <sup>a,b,c</sup> |              |           |
|----------------------------------------|----------------------|---------------|-----------|------------------------|--------------|-----------|-----------------------------------------------------------|--------------|-----------|
| a) Lp(a)                               | $\beta$              | 95% CI        | p-value   | $\beta$                | 95% CI       | p-value   | $\beta$                                                   | 95% CI       | p-value   |
| Age (per year)                         | 0.07                 | -0.01,0.14    | 0.07      | 0.08                   | -0.02,0.18   | 0.10      | 0.09                                                      | -0.01,0.18   | 0.06      |
| Female                                 | 3.01                 | 0.61,5.41     | 0.02*     | 2.86                   | 0.37,5.35    | 0.03*     |                                                           |              | 0.04      |
| Race/ethnicity                         |                      |               | <0.001*** |                        |              | <0.001*** | 2.71                                                      | 0.21,5.20    | <0.001*** |
| Non-Hispanic White                     | 21.46                | 19.18,23.73   | -         | 21.67                  | 19.36,23.98  | -         | -                                                         | -            | -         |
| Non-Hispanic Black                     | -5.1                 | -7.35,-2.85   | -         | -4.45                  | -6.67,-2.23  | -         | 22.22                                                     | 19.81,24.63  | -         |
| Mexican-American                       | -0.26                | -4.95,4.44    | -         | -0.1                   | -4.43,4.23   | -         | -4.88                                                     | -7.05,-2.71  | -         |
| Other                                  | 0.07                 | -0.01,0.14    | -         | 0.08                   | -0.02,0.18   | -         | 0.11                                                      | -3.71,3.93   | -         |
| BMI                                    | -                    | -             | 0.10      | -                      | -            | 0.13      | -                                                         | -            | 0.14      |
| <18 kg/m <sup>2</sup>                  | -                    | -             | -         | -                      | -            | -         | -                                                         | -            | -         |
| 18-25 kg/m <sup>2</sup>                | 5.95                 | 0.43,11.48    | -         | 6.3                    | 0.22,12.39   | -         | 6.80                                                      | 1.20,12.40   | -         |
| >25 kg/m <sup>2</sup>                  | 6.79                 | 0.67,12.91    | -         | 5.85                   | -0.32,12.02  | -         | 6.37                                                      | 0.69,12.05   | -         |
| Diabetes                               | 1.51                 | -1.02,4.04    | 0.23      | -1.07                  | -3.54,1.40   | 0.38      | -0.58                                                     | -4.11,2.94   | 0.74      |
| Hypertension                           | 4.22                 | 2.22,6.22     | <0.001*** | 1.42                   | -0.25,3.09   | 0.09      | 1.08                                                      | -0.68,2.84   | 0.22      |
| eGFR (per ml/min /1.73m <sup>2</sup> ) | 0.04                 | -0.03,0.10    | 0.24      | 0.02                   | -0.06,0.10   | 0.59      | 0.02                                                      | -0.06,0.10   | 0.58      |
| Taking Statin                          | 19.97                | 8.43,31.51    | 0.002**   | 20.25                  | 9.03,31.47   | 0.001**   | 21.83                                                     | 12.32,31.33  | <0.001*** |
| Active smoker                          | 0.49                 | -1.47,2.46    | 0.61      | 0.49                   | -1.29,2.28   | 0.57      | 0.06                                                      | -1.78,1.91   | 0.94      |
| Saturated Fat (per % kcal)             | -0.32                | -0.61,-0.03   | 0.03*     | -0.27                  | -0.55,0.02   | 0.06      | -0.27                                                     | -0.55,0.02   | 0.07      |
| Daily Alcohol (per g)                  | 0.02                 | -0.01,0.05    | 0.23      | 0.02                   | -0.01,0.05   | 0.17      | 0                                                         | -0.03,0.03   | 0.89      |
| b) LDL-C                               |                      |               |           |                        |              |           |                                                           |              |           |
|                                        | $\beta$              | 95% CI        | p-value   | $\beta$                | 95% CI       | p-value   | $\beta$                                                   | 95% CI       | p-value   |
| Age (per year)                         | 0.70                 | 0.60,0.80     | <0.001*** | 0.50                   | 0.41,0.59    | <0.001*** | 0.62                                                      | 0.54,0.70    | <0.001*** |
| Female                                 | -3.51                | -6.33,-0.70   | 0.02*     | -2.63                  | -5.08,-0.17  | 0.04*     | -2.82                                                     | -5.31,-0.33  | 0.028*    |
| Race/ethnicity                         |                      |               | <0.001*** |                        |              | <0.001*** |                                                           |              | <0.001*** |
| Non-Hispanic White                     | -14.08               | -16.90,-11.25 | -         | -12.18                 | -15.38,-8.97 | -         |                                                           |              | -         |
| Non-Hispanic Black                     | -4.12                | -6.87,-1.37   | -         | -0.53                  | -3.22,2.15   | -         | -12.79                                                    | -16.03,-9.55 | -         |
| Mexican-American                       | -0.35                | -8.40,7.70    | -         | 3.09                   | -3.37,9.55   | -         | -0.90                                                     | -3.50,1.70   | -         |
| Other                                  | 0.70                 | 0.60,0.80     | -         | 0.50                   | 0.41,0.59    | -         | 2.72                                                      | -3.14,8.58   | -         |
| BMI                                    | -                    | -             | <0.001*** | -                      | -            | <0.001*** | -                                                         | -            | <0.001*** |
| <18 kg/m <sup>2</sup>                  | -                    | -             | -         | -                      | -            | -         | -                                                         | -            | -         |
| 18-25 kg/m <sup>2</sup>                | 14.92                | 6.18,23.65    | -         | 14.11                  | 5.79,22.43   | -         | 17.82                                                     | 12.70,22.94  | -         |
| >25 kg/m <sup>2</sup>                  | 35.35                | 26.92,43.77   | -         | 30.19                  | 21.75,38.62  | -         | 32.12                                                     | 26.38,37.86  | -         |
| Diabetes                               | 14.11                | 10.78,17.44   | <0.001*** | 0.08                   | -3.76,3.91   | 0.810.978 | 7.69                                                      | 1.16,14.21   | 0.02*     |
| Hypertension                           | 16.28                | 13.14,19.42   | <0.001*** | 5.15                   | 1.85,8.46    | 0.004**   | 5.45                                                      | 1.83,9.07    | 0.005**   |
| eGFR (per ml/min /1.73m <sup>2</sup> ) | -0.54                | -0.65,-0.43   | <0.001*** | -0.11                  | -0.22,-0.01  | 0.04*     | -0.11                                                     | -0.22,-0.01  | 0.04*     |
| Taking Statin                          | 10.75                | -0.17,21.67   | 0.053     | -6.64                  | -17.96,4.69  | 0.24      | -7.68                                                     | -18.81,3.44  | 0.17      |
| Active smoker                          | -0.95                | -3.88,1.97    | 0.51      | 3.14                   | 0.49,5.79    | 0.02*     | 2.91                                                      | 0.43,5.38    | 0.02*     |
| Saturated Fat (per % kcal)             | 0.33                 | -0.05,0.72    | 0.08      | 0.31                   | -0.04,0.66   | 0.08      | 0.32                                                      | -0.01,0.65   | 0.054     |
| Daily Alcohol (per g)                  | -0.09                | -0.12,-0.05   | <0.001*** | -0.06                  | -0.09,-0.03  | 0.001*    | -0.06                                                     | -0.09,-0.02  | 0.002**   |

1. Abbreviations: CI = Confidence Interval; Lp(a) = Lipoprotein(a); LDL-C = Low-Density Lipoprotein Cholesterol; BMI = Body Mass Index; eGFR = estimated glomerular filtration rate

2. \* = <0.05; \*\* = <0.01; \*\*\* = <0.001

3. <sup>a</sup> In the Lp(a) model, interactions included between age and race/ethnicity, sex and race/ethnicity, race/ethnic and statin, diabetes and BMI, alcohol and smoking, and hypertension and smoking.

4. <sup>b</sup> In the LDL-C model, interactions included age<sup>2</sup>, between age and sex, age and diabetes, age and BMI, BMI and diabetes, eGFR and saturated fat content, eGFR and smoking, race/ethnicity and alcohol, and sex and BMI.

5. <sup>c</sup> Effect sizes between Lp(a) and LDL-C in Model 3 can only be compared if variables are transformed to the same linear or non-linear association with the outcome.

**Table E3.** Associations between Vitamins, Minerals, and Heavy Metals with Lp(a) and LDL-C in univariate, multivariate, and multivariate with interaction term models excluding samples with Lp(a)=0.

|                        | Model 1 - univariate |             |           | Model 2 - multivariate |             |           | Model 3 - multivariate with Interactions <sup>a,b,c</sup> |             |           |
|------------------------|----------------------|-------------|-----------|------------------------|-------------|-----------|-----------------------------------------------------------|-------------|-----------|
| a) Lp(a)               | $\beta$              | 95% CI      | p-value   | $\beta$                | 95% CI      | p-value   | $\beta$                                                   | 95% CI      | p-value   |
| Vitamin A              | 0.00                 | -0.09,0.09  | 0.97      | 0.03                   | -0.04,0.10  | 0.36      | 0.04                                                      | -0.03,0.12  | 0.25      |
| Retinyl Esters         | 0.08                 | -0.14,0.30  | 0.46      | 0.10                   | -0.13,0.32  | 0.39      | 0.63                                                      | 0.38,0.89   | <0.001*** |
| Vitamin B12            | 0.00                 | -0.00,0.00  | 0.21      | 0.00                   | -0.00,0.00  | 0.30      | 1.57                                                      | -0.25,3.38  | 0.09      |
| Folate                 | -0.14                | -0.28,0.00  | 0.06      | -0.11                  | -0.27,0.05  | 0.18      | -0.10                                                     | -0.26,0.07  | 0.23      |
| RBC Folate             | -0.01                | -0.02,-0.00 | 0.04*     | 0.00                   | -0.01,0.01  | 0.38      | -0.01                                                     | -0.02,0.01  | 0.32      |
| Vitamin C              | -1.62                | -4.68,1.45  | 0.29      | -1.03                  | -4.25,2.19  | 0.52      | -0.81                                                     | -4.12,2.51  | 0.62      |
| Vitamin E              | 0.00                 | -0.00,0.00  | 0.06      | 0.00                   | 0.00,0.01   | 0.005**   | 0.01                                                      | 0.00,0.01   | <0.001*** |
| Lycopene               | 0.11                 | -0.02,0.25  | 0.09      | 0.18                   | 0.05,0.30   | 0.007**   | 0.19                                                      | 0.07,0.32   | 0.004**   |
| Lutein                 | 0.22                 | 0.12,0.33   | <0.001*** | 0.16                   | 0.05,0.26   | 0.005**   | 4.66                                                      | 2.20,7.11   | 0.001**   |
| $\beta$ -cryptoxanthin | 0.14                 | -0.02,0.31  | 0.09      | 0.18                   | 0.00,0.36   | 0.049*    | 3.16                                                      | 0.95,5.37   | 0.007**   |
| $\beta$ -carotene      | 0.04                 | 0.01,0.07   | 0.009**   | 0.04                   | -0.00,0.07  | 0.054     | 1.83                                                      | 0.42,3.23   | 0.01*     |
| $\alpha$ -carotene     | 0.03                 | -0.10,0.16  | 0.61      | 0.09                   | -0.03,0.21  | 0.14      | 0.10                                                      | -0.02,0.22  | 0.09      |
| Selenium               | -0.04                | -0.12,0.04  | 0.31      | 0.03                   | -0.06,0.12  | 0.49      | 3.66                                                      | -6.76,14.07 | 0.48      |
| Ferritin               | -0.05                | -0.08,-0.01 | 0.007**   | -0.01                  | -0.04,0.02  | 0.38      | -1.01                                                     | -3.64,1.63  | 0.44      |
| Transferrin Saturation | -0.15                | -0.27,-0.03 | 0.02*     | -0.06                  | -0.17,0.05  | 0.29      | -0.06                                                     | -0.17,0.06  | 0.33      |
| Calcium                | 0.17                 | -2.27,2.61  | 0.89      | 0.13                   | -1.92,2.19  | 0.90      | 0.19                                                      | -1.94,2.33  | 0.85      |
| Lead                   | 0.62                 | 0.10,1.14   | 0.02*     | 0.42                   | -0.11,0.95  | 0.12      | 0.41                                                      | -0.13,0.94  | 0.13      |
| b) LDL-C               | $\beta$              | 95% CI      | p-value   | $\beta$                | 95% CI      | p-value   | $\beta$                                                   | 95% CI      | p-value   |
| Vitamin A              | 0.63                 | 0.49,0.76   | <0.001*** | 0.44                   | 0.31,0.57   | <0.001*** | 0.51                                                      | 0.41,0.62   | <0.001*** |
| Retinyl Esters         | 2.12                 | 1.71,2.53   | <0.001*** | 1.79                   | 1.40,2.17   | <0.001*** | 2.79                                                      | 2.40,3.19   | <0.001*** |
| Vitamin B12            | 0.00                 | -0.00,0.00  | 0.29      | 0.00                   | -0.00,0.00  | 0.77      | -0.78                                                     | -4.32,2.76  | 0.65      |
| Folate                 | 0.19                 | -0.00,0.38  | 0.054     | -0.16                  | -0.36,0.05  | 0.12      | -0.16                                                     | -0.38,0.06  | 0.13      |
| RBC Folate             | 0.02                 | 0.01,0.03   | <0.001*** | -0.01                  | -0.02,-0.00 | 0.02*     | -0.01                                                     | -0.02,-0.00 | 0.01*     |
| Vitamin C              | -2.70                | -6.11,0.72  | 0.12      | -4.01                  | -7.71,-0.31 | 0.04*     | -4.99                                                     | -8.49,-1.48 | 0.007**   |
| Vitamin E              | 0.04                 | 0.03,0.04   | <0.001*** | 0.03                   | 0.02,0.03   | <0.001*** | 0.06                                                      | 0.06,0.06   | <0.001*** |
| Lycopene               | 0.78                 | 0.64,0.93   | <0.001*** | 1.03                   | 0.90,1.17   | <0.001*** | 0.99                                                      | 0.85,1.12   | <0.001*** |
| Lutein                 | 0.82                 | 0.69,0.95   | <0.001*** | 0.72                   | 0.62,0.83   | <0.001*** | 16.84                                                     | 14.30,19.37 | <0.001*** |
| $\beta$ -cryptoxanthin | 0.64                 | 0.37,0.90   | <0.001*** | 0.75                   | 0.52,0.98   | <0.001*** | 10.32                                                     | 7.93,12.72  | <0.001*** |
| $\beta$ -carotene      | 0.20                 | 0.11,0.28   | <0.001*** | 0.15                   | 0.08,0.22   | <0.001*** | 7.22                                                      | 5.39,9.06   | <0.001*** |
| $\alpha$ -carotene     | 0.51                 | 0.22,0.79   | 0.001**   | 0.39                   | 0.12,0.66   | 0.007**   | 4.28                                                      | 2.67,5.90   | <0.001*** |
| Selenium               | 0.28                 | 0.15,0.41   | <0.001*** | 0.25                   | 0.14,0.35   | <0.001*** | 0.29                                                      | 0.20,0.38   | <0.001*** |
| Ferritin               | -0.02                | -0.06,0.02  | 0.33      | 0.03                   | -0.01,0.06  | 0.11      | 0.03                                                      | -0.00,0.06  | 0.07      |
| Transferrin Saturation | -0.12                | -0.28,0.03  | 0.11      | -0.04                  | -0.18,0.09  | 0.52      | 0.14                                                      | -0.00,0.28  | 0.06      |
| Calcium                | 6.28                 | 1.66,10.89  | 0.01      | 9.19                   | 5.66,12.72  | <0.001*** | 10.08                                                     | 6.50,13.65  | <0.001*** |
| Lead                   | 1.73                 | 1.14,2.33   | <0.001*** | 0.49                   | -0.18,1.15  | 0.07      | 2.72                                                      | 0.40,5.04   | 0.02*     |

1. Abbreviations: CI = Confidence Interval; Lp(a) = Lipoprotein(a); LDL-C = Low-Density Lipoprotein Cholesterol; RBC = Red Blood Cell

2. \* = <0.05, \*\* = <0.01, \*\*\* = <0.001

3. <sup>a</sup> In the Lp(a) model, vitamin, mineral, and lead covariates transformed as follows (otherwise linear): Retinyl Esters<sup>4</sup>, RBC-folate<sup>4</sup>, vitamin E<sup>4</sup>, ln(vitamin B12), ln(lutein), ln( $\beta$ -cryptoxanthin), ln( $\beta$ -carotene), ln(selenium), ln(ferritin). Interactions were present including between vitamin A and statins, vitamin A and saturated fat, retinyl esters and statins, retinyl esters and saturated fat, vitamin C and BMI, vitamin E and statin, vitamin E and hypertension, lycopene and saturated fat,  $\alpha$ -carotene and diabetes, selenium and race/ethnicity, calcium and sex, and calcium and hypertension.

4. <sup>b</sup> In the LDL-C model, vitamin, mineral, and lead covariates were transformed as follow (otherwise linear): vitamin A<sup>2</sup>, Retinyl Esters<sup>3</sup>, ln(vitamin B12), vitamin C<sup>3</sup>, vitamin E<sup>4</sup>, ln(lutein), ln( $\beta$ -cryptoxanthin), ln( $\beta$ -carotene),ln( $\alpha$ -carotene), selenium<sup>2</sup>, transferrin saturation<sup>4</sup>, and ln(lead). Interactions were present, including vitamin A and diabetes, vitamin A and race/ethnicity, retinyl esters and eGFR, retinyl

esters and saturated fat, RBC-folate and statin, RBC-folate and race/ethnicity, vitamin C and race/ethnicity, vitamin E and hypertension, lycopene and BMI, lycopene and diabetes, lycopene and saturated fat, lycopene and eGFR, lutein and saturated fat,  $\beta$ -cryptoxanthin and race/ethnicity,  $\beta$ -cryptoxanthin and saturated fat,  $\beta$ -carotene and sex,  $\beta$ -carotene and diabetes,  $\beta$ -carotene and race/ethnicity,  $\beta$ -carotene and saturated fat,  $\alpha$ -carotene and age,  $\alpha$ -carotene and race/ethnicity,  $\alpha$ -carotene and diabetes,  $\alpha$ -carotene and saturated fat, selenium and hypertension, transferrin saturation and sex, calcium and age, calcium and saturated fat, lead and eGFR, and lead and sex.

5. <sup>c</sup> Effect sizes between Lp(a) and LDL-C in Model 3 can only be compared if variables are transformed to the same linear or non-linear association with the outcome.

**Table E4.** Associations between Vitamins, Minerals, and Heavy Metals with Lp(a) and LDL-C at ln(x + 1) transformed outcomes in univariate, multivariate, and multivariate with interaction term models.

|                        | Model 1 - univariate |                 |           | Model 2 - multivariate |                 |           | Model 3 - multivariate with Interactions <sup>a,b,c</sup> |                 |           |
|------------------------|----------------------|-----------------|-----------|------------------------|-----------------|-----------|-----------------------------------------------------------|-----------------|-----------|
| a) Lp(a)               | $\beta$              | 95% CI          | p-value   | $\beta$                | 95% CI          | p-value   | $\beta$                                                   | 95% CI          | p-value   |
| Vitamin A              | -0.0012              | -0.0049,0.0025  | 0.50      | 0.0017                 | -0.0023,0.0057  | 0.40      | 0.0023                                                    | -0.0018,0.0065  | 0.26      |
| Retinyl Esters         | -0.0066              | -0.0227,0.0096  | 0.41      | -0.0055                | -0.0208,0.0098  | 0.47      | 0.03                                                      | 0.0166,0.0435   | <0.001*** |
| Vitamin B12            | 0.0001               | -0.0000,0.0002  | 0.17      | 0                      | -0.0000,0.0001  | 0.48      | 0.0724                                                    | -0.0506,0.1953  | 0.24      |
| Folate                 | -0.0058              | -0.0142,0.0026  | 0.17      | -0.0055                | -0.0151,0.0041  | 0.25      | -0.0056                                                   | -0.0157,0.0045  | 0.27      |
| RBC Folate             | -0.0007              | -0.0012,-0.0001 | 0.03*     | -0.0003                | -0.0010,0.0003  | 0.26      | -0.0003                                                   | -0.0011,0.0006  | 0.54      |
| Vitamin C              | 0.0158               | -0.1288,0.1604  | 0.82      | 0.0141                 | -0.1308,0.1589  | 0.84      | 0.0213                                                    | -0.1219,0.1644  | 0.76      |
| Vitamin E              | 0.0000               | -0.0002,0.0001  | 0.92      | 0.0001                 | -0.0001,0.0002  | 0.49      | 0.0003                                                    | 0.0001,0.0005   | 0.002**   |
| Lycopene               | 0.0049               | 0.0003,0.0095   | 0.04*     | 0.0074                 | 0.0027,0.0121   | 0.003**   | 0.0078                                                    | 0.0032,0.0124   | 0.002**   |
| Lutein                 | 0.0144               | 0.0082,0.0205   | <0.001*** | 0.0113                 | 0.0053,0.0173   | 0.001**   | 0.3441                                                    | 0.2133,0.4750   | <0.001*** |
| $\beta$ -cryptoxanthin | 0.0117               | 0.0035,0.0198   | 0.007**   | 0.0111                 | 0.0041,0.0182   | 0.003**   | 0.1685                                                    | 0.0793,0.2576   | 0.001**   |
| $\beta$ -carotene      | 0.0049               | 0.0029,0.0069   | <0.001*** | 0.004                  | 0.0018,0.0061   | 0.001**   | 0.1537                                                    | 0.0820,0.2255   | <0.001*** |
| $\alpha$ -carotene     | 0.0146               | 0.0049,0.0244   | 0.005**   | 0.0147                 | 0.0053,0.0241   | 0.004**   | 0.0153                                                    | 0.0060,0.0246   | 0.002**   |
| Selenium               | -0.0032              | -0.0071,0.0007  | 0.11      | -0.0001                | -0.0041,0.0038  | 0.94      | -0.01                                                     | -0.4993,0.4793  | 0.97      |
| Ferritin               | -0.0016              | -0.0030,-0.0003 | 0.02*     | -0.0003                | -0.0017,0.0012  | 0.69      | -0.0007                                                   | -0.1210,0.1197  | 0.99      |
| Transferrin Saturation | -0.006               | -0.0114,-0.0006 | 0.03*     | -0.0025                | -0.0082,0.0031  | 0.37      | -0.0025                                                   | -0.0083,0.0034  | 0.39      |
| Calcium                | -0.0322              | -0.1792,0.1148  | 0.67      | -0.0305                | -0.1706,0.1095  | 0.66      | -0.0265                                                   | -0.1641,0.1110  | 0.69      |
| Lead                   | 0.0241               | -0.0037,0.0519  | 0.086     | 0.0264                 | -0.0008,0.0535  | 0.06      | 0.0259                                                    | -0.0014,0.0532  | 0.06      |
| b) LDL-C               | $\beta$              | 95% CI          | p-value   | $\beta$                | 95% CI          | p-value   | B                                                         | 95% CI          | p-value   |
| Vitamin A              | 0.0052               | 0.0043,0.0062   | <0.001*** | 0.0036                 | 0.0027,0.0046   | <0.001*** | 0.0044                                                    | 0.0034,0.0053   | <0.001*** |
| Retinyl Esters         | 0.0172               | 0.0128,0.0216   | <0.001*** | 0.0141                 | 0.0098,0.0184   | <0.001*** | 0.0246                                                    | 0.0210,0.0281   | <0.001*** |
| Vitamin B12            | 0                    | -0.0000,0.0000  | 0.34      | 0                      | -0.0000,0.0000  | 0.85      | 0.0007                                                    | -0.0235,0.0249  | 0.95      |
| Folate                 | 0.0025               | 0.0008,0.0041   | 0.005**   | -0.0006                | -0.0024,0.0011  | 0.45      | -0.0008                                                   | -0.0024,0.0009  | 0.35      |
| RBC Folate             | 0.0002               | 0.0001,0.0003   | <0.001*** | -0.0001                | -0.0002,0.0000  | 0.02*     | -0.0001                                                   | -0.0002,0.0000  | 0.07      |
| Vitamin C              | -0.0265              | -0.0599,0.0069  | 0.02      | -0.0393                | -0.0714,-0.0073 | <0.001*** | -0.0514                                                   | -0.0860,-0.0169 | 0.005**   |
| Vitamin E              | 0.0003               | 0.0002,0.0003   | <0.001*** | 0.0002                 | 0.0002,0.0003   | <0.001*** | 0.0006                                                    | 0.0005,0.0006   | <0.001*** |
| Lycopene               | 0.0073               | 0.0062,0.0084   | <0.001*** | 0.0095                 | 0.0087,0.0103   | <0.001*** | 0.0091                                                    | 0.0081,0.0100   | <0.001*** |
| Lutein                 | 0.007                | 0.0058,0.0081   | <0.001*** | 0.0063                 | 0.0052,0.0073   | <0.001*** | 0.1448                                                    | 0.1196,0.1700   | <0.001*** |
| $\beta$ -cryptoxanthin | 0.0058               | 0.0038,0.0078   | <0.001*** | 0.0069                 | 0.0051,0.0088   | <0.001*** | 0.0912                                                    | 0.0703,0.1122   | <0.001*** |
| $\beta$ -carotene      | 0.0019               | 0.0014,0.0025   | <0.001*** | 0.0016                 | 0.0010,0.0021   | <0.001*** | 0.0701                                                    | 0.0526,0.0875   | <0.001*** |
| $\alpha$ -carotene     | 0.0051               | 0.0029,0.0072   | <0.001*** | 0.0043                 | 0.0021,0.0065   | 0.001**   | 0.0423                                                    | 0.0294,0.0552   | <0.001*** |
| Selenium               | 0.0024               | 0.0014,0.0035   | <0.001*** | 0.0023                 | 0.0015,0.0031   | <0.001*** | 0.0029                                                    | 0.0023,0.0035   | <0.001*** |
| Ferritin               | -0.0002              | -0.0006,0.0001  | 0.16      | 0.0002                 | -0.0001,0.0005  | 0.20      | 0.0002                                                    | -0.0001,0.0005  | 0.14      |
| Transferrin Saturation | -0.0014              | -0.0027,-0.0002 | 0.03*     | -0.0007                | -0.0019,0.0005  | 0.26      | 0.0013                                                    | 0.0003,0.0024   | 0.02*     |
|                        | 0.0542               | 0.0190,0.0893   | 0.004**   | 0.0785                 | 0.0529,0.1041   | <0.001*** | 0.0886                                                    | 0.0602,0.1169   | <0.001*** |
| Lead                   | 0.0143               | 0.0088,0.0199   | <0.001*** | 0.0039                 | -0.0016,0.0095  | 0.16      | 0.0197                                                    | -0.0003,0.0398  | 0.053     |

1. Abbreviations: CI = Confidence Interval; Lp(a) = Lipoprotein(a); LDL-C = Low-Density Lipoprotein Cholesterol; RBC = Red Blood Cell

2. \* = <0.05, \*\* = <0.01, \*\*\* = <0.001

3. <sup>a</sup> In the Lp(a) model, vitamin, mineral, and lead covariates transformed as follows (otherwise linear): Retinyl Esters<sup>4</sup>, RBC-folate<sup>4</sup>, vitamin E<sup>4</sup>, ln(vitamin B12), ln(lutein), ln( $\beta$ -cryptoxanthin), ln( $\beta$ -carotene), ln(selenium), ln(ferritin). Interactions were present including between vitamin A and statins, vitamin A and saturated fat, retinyl esters and statins, retinyl esters and saturated fat, vitamin C and BMI, vitamin E and statin, vitamin E and hypertension, lycopene and saturated fat,  $\alpha$ -carotene and diabetes, selenium and race/ethnicity, calcium and sex, and calcium and hypertension.

4. <sup>b</sup> In the LDL-C model, vitamin, mineral, and lead covariates were transformed as follow (otherwise linear): vitamin A<sup>2</sup>, Retinyl Esters<sup>3</sup>, ln(vitamin B12), vitamin C<sup>3</sup>, vitamin E<sup>4</sup>, ln(lutein), ln( $\beta$ -cryptoxanthin), ln( $\beta$ -carotene),ln( $\alpha$ -carotene), selenium<sup>2</sup>, transferrin saturation<sup>4</sup>, and ln(lead). Interactions were present, including vitamin A and diabetes, vitamin A and race/ethnicity, retinyl esters and eGFR, retinyl

esters and saturated fat, RBC-folate and statin, RBC-folate and race/ethnicity, vitamin C and race/ethnicity, vitamin E and hypertension, lycopene and BMI, lycopene and diabetes, lycopene and saturated fat, lycopene and eGFR, lutein and saturated fat,  $\beta$ -cryptoxanthin and race/ethnicity,  $\beta$ -cryptoxanthin and saturated fat,  $\beta$ -carotene and sex,  $\beta$ -carotene and diabetes,  $\beta$ -carotene and race/ethnicity,  $\beta$ -carotene and saturated fat,  $\alpha$ -carotene and age,  $\alpha$ -carotene and race/ethnicity,  $\alpha$ -carotene and diabetes,  $\alpha$ -carotene and saturated fat, selenium and hypertension, transferrin saturation and sex, calcium and age, calcium and saturated fat, lead and eGFR, and lead and sex.

5. <sup>c</sup> Effect sizes between Lp(a) and LDL-C in Model 3 can only be compared if variables are transformed to the same linear or non-linear association with the outcome.

**Table E5.** Associations between Vitamins, Minerals, and Heavy Metals with Lp(a) and LDL-C as quartiles in univariate and multivariate models.

A. Lp(a)

|                        | Model 1 - univariate |               |           | Model 2 - multivariate |               |           |
|------------------------|----------------------|---------------|-----------|------------------------|---------------|-----------|
|                        | $\beta$              | 95% CI        | p-value   | $\beta$                | 95% CI        | p-value   |
| Vitamin A              |                      |               |           |                        |               |           |
| Quartile 1             | 0.003                | -0.001,0.007  | 0.16      | 0.001                  | -0.004,0.005  | 0.71      |
| Quartile 3             | 0.000                | -0.004,0.004  | 0.91      | 0.001                  | -0.003,0.006  | 0.59      |
| Quartile 4             | 0.002                | -0.002,0.006  | 0.25      | 0.003                  | -0.001,0.008  | 0.15      |
| Retinyl Esters         |                      |               |           |                        |               |           |
| Quartile 1             | 0.005                | -0.013,0.023  | 0.59      | 0.006                  | -0.013,0.024  | 0.55      |
| Quartile 3             | -0.004               | -0.022,0.015  | 0.68      | -0.002                 | -0.021,0.017  | 0.84      |
| Quartile 4             | 0.017                | -0.001,0.034  | 0.06      | 0.017                  | -0.002,0.036  | 0.08      |
| Vitamin B12            |                      |               |           |                        |               |           |
| Quartile 1             | 0.000                | -0.000,0.000  | 0.23      | 0.000                  | -0.000,0.000  | 0.25      |
| Quartile 3             | 0.000                | -0.000,0.000  | 0.33      | 0.000                  | -0.000,0.000  | 0.38      |
| Quartile 4             | 0.000                | -0.000,0.000  | 0.30      | 0.000                  | -0.000,0.000  | 0.33      |
| Folate                 |                      |               |           |                        |               |           |
| Quartile 1             | 0.0100               | -0.001,0.020  | 0.06      | 0.009                  | -0.003,0.020  | 0.14      |
| Quartile 3             | 0.0010               | -0.010,0.012  | 0.90      | 0.012                  | -0.000,0.024  | 0.05      |
| Quartile 4             | -0.011               | -0.022,0.001  | 0.07      | 0.000                  | -0.013,0.013  | 0.99      |
| RBC Folate             |                      |               |           |                        |               |           |
| Quartile 1             | 0.001                | 0.000,0.001   | 0.002**   | 0.001                  | -0.000,0.001  | 0.06      |
| Quartile 3             | -0.001               | -0.001,-0.000 | 0.048*    | 0.000                  | -0.000,0.001  | 0.28      |
| Quartile 4             | -0.001               | -0.002,-0.001 | <0.001*** | 0.000                  | -0.001,0.001  | 0.99      |
| Vitamin C              |                      |               |           |                        |               |           |
| Quartile 1             | -0.016               | -0.157,0.126  | 0.83      | -0.036                 | -0.189,0.118  | 0.65      |
| Quartile 3             | -0.118               | -0.265,0.030  | 0.12      | 0.058                  | -0.102,0.218  | 0.48      |
| Quartile 4             | -0.31                | -0.460,-0.161 | <0.001*** | -0.107                 | -0.274,0.061  | 0.21      |
| Vitamin E              |                      |               |           |                        |               |           |
| Quartile 1             | 0.000                | 0.000,0.000   | 0.02*     | 0.000                  | -0.000,0.000  | 0.18      |
| Quartile 3             | 0.000                | -0.000,0.000  | 0.12      | 0.000                  | -0.000,0.000  | 0.45      |
| Quartile 4             | 0.000                | -0.000,0.000  | 0.44      | 0.000                  | 0.000,0.000   | <0.001*** |
| Lycopene               |                      |               |           |                        |               |           |
| Quartile 1             | -0.006               | -0.012,-0.000 | 0.04*     | -0.007                 | -0.013,-0.000 | 0.04*     |
| Quartile 3             | 0.003                | -0.002,0.009  | 0.24      | 0.004                  | -0.002,0.011  | 0.19      |
| Quartile 4             | 0.011                | 0.006,0.017   | <0.001*** | 0.016                  | 0.009,0.022   | <0.001*** |
| Lutein                 |                      |               |           |                        |               |           |
| Quartile 1             | -0.008               | -0.014,-0.002 | 0.01*     | -0.006                 | -0.013,0.000  | 0.052     |
| Quartile 3             | 0.006                | 0.000,0.012   | 0.03*     | 0.006                  | -0.001,0.012  | 0.08      |
| Quartile 4             | 0.015                | 0.009,0.021   | <0.001*** | 0.012                  | 0.006,0.018   | <0.001*** |
| $\beta$ -cryptoxanthin |                      |               |           |                        |               |           |
| Quartile 1             | -0.001               | -0.008,0.007  | 0.88      | -0.005                 | -0.013,0.003  | 0.24      |
| Quartile 3             | -0.008               | -0.016,-0.000 | 0.045*    | 0.004                  | -0.005,0.012  | 0.42      |
| Quartile 4             | -0.008               | -0.015,0.000  | 0.06      | 0.013                  | 0.004,0.022   | 0.003**   |
| $\beta$ -carotene      |                      |               |           |                        |               |           |
| Quartile 1             | -0.004               | -0.008,-0.001 | 0.02*     | -0.004                 | -0.008,-0.000 | 0.03*     |
| Quartile 3             | 0.001                | -0.002,0.005  | 0.35      | 0.002                  | -0.001,0.006  | 0.17      |
| Quartile 4             | 0.005                | 0.002,0.008   | 0.001**   | 0.004                  | 0.001,0.008   | 0.008**   |
| $\alpha$ -carotene     |                      |               |           |                        |               |           |
| Quartile 1             | -0.011               | -0.022,0.000  | 0.052     | -0.019                 | -0.034,-0.004 | 0.01*     |
| Quartile 3             | -0.002               | -0.011,0.007  | 0.68      | 0.006                  | -0.005,0.017  | 0.30      |
| Quartile 4             | -0.008               | -0.019,0.003  | 0.15      | 0.003                  | -0.009,0.014  | 0.64      |
| Selenium               |                      |               |           |                        |               |           |

|                               |            |        |               |           |        |              |      |
|-------------------------------|------------|--------|---------------|-----------|--------|--------------|------|
|                               | Quartile 1 | 0.004  | 0.001,0.008   | 0.02*     | 0.002  | -0.002,0.005 | 0.41 |
|                               | Quartile 3 | -0.004 | -0.008,-0.000 | 0.048*    | 0.001  | -0.003,0.005 | 0.57 |
|                               | Quartile 4 | -0.005 | -0.009,-0.002 | 0.005**   | 0.003  | -0.001,0.007 | 0.09 |
| <b>Ferritin</b>               |            |        |               |           |        |              |      |
|                               | Quartile 1 | 0.002  | 0.000,0.004   | 0.02*     | 0.001  | -0.001,0.003 | 0.17 |
|                               | Quartile 3 | 0.000  | -0.002,0.002  | 0.90      | 0.001  | -0.001,0.003 | 0.16 |
|                               | Quartile 4 | -0.004 | -0.006,-0.002 | <0.001*** | -0.001 | -0.003,0.001 | 0.21 |
| <b>Transferrin Saturation</b> |            |        |               |           |        |              |      |
|                               | Quartile 1 | 0.007  | 0.001,0.012   | 0.02*     | 0.005  | -0.001,0.011 | 0.08 |
|                               | Quartile 3 | 0.002  | -0.004,0.008  | 0.54      | 0.005  | -0.002,0.011 | 0.14 |
|                               | Quartile 4 | -0.010 | -0.016,-0.004 | 0.001**   | -0.003 | -0.010,0.003 | 0.30 |
| <b>Calcium</b>                |            |        |               |           |        |              |      |
|                               | Quartile 1 | 0.039  | -0.113,0.191  | 0.62      | 0.054  | -0.102,0.210 | 0.50 |
|                               | Quartile 3 | 0.043  | -0.114,0.199  | 0.59      | -0.042 | -0.205,0.120 | 0.61 |
|                               | Quartile 4 | 0.093  | -0.062,0.248  | 0.24      | -0.019 | -0.185,0.146 | 0.82 |
| <b>Lead</b>                   |            |        |               |           |        |              |      |
|                               | Quartile 1 | -0.007 | -0.030,0.016  | 0.55      | -0.012 | -0.038,0.015 | 0.38 |
|                               | Quartile 3 | 0.012  | -0.010,0.035  | 0.28      | -0.006 | -0.032,0.020 | 0.66 |
|                               | Quartile 4 | 0.036  | 0.015,0.057   | 0.001**   | 0.015  | -0.010,0.040 | 0.25 |

**B. LDL:**

|                       |            | Model 1 – univariate |               |            | Model 2 – multivariate |               |           |
|-----------------------|------------|----------------------|---------------|------------|------------------------|---------------|-----------|
|                       |            | $\beta$              | 95% CI        | p-value    | B                      | 95% CI        | p-value   |
| <b>Vitamin A</b>      |            |                      |               |            |                        |               |           |
|                       | Quartile 1 | -0.02                | -0.024,-0.015 | 0<0.001*** | -0.014                 | -0.019,-0.009 | <0.001*** |
|                       | Quartile 3 | 0.013                | 0.009,0.017   | 0<0.001*** | 0.009                  | 0.004,0.013   | <0.001*** |
|                       | Quartile 4 | 0.03                 | 0.026,0.034   | <0.001***  | 0.024                  | 0.019,0.029   | <0.001*** |
| <b>Retinyl Esters</b> |            |                      |               |            |                        |               |           |
|                       | Quartile 1 | -0.077               | -0.101,-0.054 | <0.001***  | -0.090                 | -0.115,-0.065 | <0.001*** |
|                       | Quartile 3 | 0.056                | 0.035,0.076   | <0.001***  | 0.061                  | 0.039,0.082   | <0.001*** |
|                       | Quartile 4 | 0.118                | 0.098,0.137   | <0.001***  | 0.117                  | 0.096,0.138   | <0.001*** |
| <b>Vitamin B12</b>    |            |                      |               |            |                        |               |           |
|                       | Quartile 1 | 0.000                | -0.000,0.000  | 0.89       | 0.000                  | -0.000,0.000  | 0.74      |
|                       | Quartile 3 | 0.000                | -0.000,0.000  | 0.28       | 0.000                  | -0.000,0.000  | 0.39      |
|                       | Quartile 4 | 0.000                | -0.000,0.000  | 0.70       | 0.000                  | -0.000,0.000  | 0.72      |
| <b>Folate</b>         |            |                      |               |            |                        |               |           |
|                       | Quartile 1 | -0.010               | -0.022,0.003  | 0.14       | 0.005                  | -0.007,0.018  | 0.41      |
|                       | Quartile 3 | 0.014                | 0.002,0.025   | 0.02*      | 0.000                  | -0.012,0.012  | 0.97      |
|                       | Quartile 4 | 0.030                | 0.019,0.041   | <0.001***  | 0.003                  | -0.009,0.015  | 0.59      |
| <b>RBC Folate</b>     |            |                      |               |            |                        |               |           |
|                       | Quartile 1 | -0.001               | -0.002,-0.000 | 0.01*      | 0.001                  | 0.000,0.002   | 0.03*     |
|                       | Quartile 3 | 0.001                | 0.000,0.002   | 0.002**    | 0.000                  | -0.001,0.000  | 0.47      |
|                       | Quartile 4 | 0.002                | 0.001,0.002   | <0.001***  | 0.000                  | -0.001,0.000  | 0.17      |
| <b>Vitamin C</b>      |            |                      |               |            |                        |               |           |
|                       | Quartile 1 | 0.1200               | -0.027,0.266  | 0.11       | 0.182                  | 0.019,0.344   | 0.03*     |
|                       | Quartile 3 | 0.1190               | -0.027,0.266  | 0.11       | 0.055                  | -0.104,0.214  | 0.50      |
|                       | Quartile 4 | 0.1850               | 0.039,0.330   | 0.01*      | 0.028                  | -0.133,0.189  | 0.73      |
| <b>Vitamin E</b>      |            |                      |               |            |                        |               |           |
|                       | Quartile 1 | -0.003               | -0.003,-0.003 | <0.001***  | -0.003                 | -0.003,-0.002 | <0.001*** |
|                       | Quartile 3 | 0.001                | 0.001,0.002   | <0.001***  | 0.001                  | 0.001,0.001   | <0.001*** |
|                       | Quartile 4 | 0.002                | 0.002,0.003   | <0.001***  | 0.002                  | 0.002,0.002   | <0.001*** |
| <b>Lycopene</b>       |            |                      |               |            |                        |               |           |
|                       | Quartile 1 | -0.019               | -0.025,-0.012 | <0.001***  | -0.044                 | -0.052,-0.037 | <0.001*** |
|                       | Quartile 3 | 0.011                | 0.005,0.017   | <0.001***  | 0.030                  | 0.023,0.037   | <0.001*** |
|                       | Quartile 4 | 0.026                | 0.020,0.032   | <0.001***  | 0.059                  | 0.052,0.066   | <0.001*** |
| <b>Lutein</b>         |            |                      |               |            |                        |               |           |



|                               |            |        |               |           |        |               |           |
|-------------------------------|------------|--------|---------------|-----------|--------|---------------|-----------|
|                               | Quartile 1 | -0.026 | -0.033,-0.019 | <0.001*** | -0.030 | -0.038,-0.022 | <0.001*** |
|                               | Quartile 3 | 0.016  | 0.010,0.022   | <0.001*** | 0.016  | 0.009,0.022   | <0.001*** |
|                               | Quartile 4 | 0.035  | 0.029,0.041   | <0.001*** | 0.035  | 0.029,0.042   | <0.001*** |
| <b>β-cryptoxanthin</b>        |            |        |               |           |        |               |           |
|                               | Quartile 1 | -0.022 | -0.032,-0.013 | <0.001*** | -0.033 | -0.044,-0.022 | <0.001*** |
|                               | Quartile 3 | 0.017  | 0.009,0.025   | <0.001*** | 0.020  | 0.010,0.029   | <0.001*** |
|                               | Quartile 4 | 0.030  | 0.022,0.037   | <0.001*** | 0.040  | 0.031,0.049   | <0.001*** |
| <b>β-carotene</b>             |            |        |               |           |        |               |           |
|                               | Quartile 1 | -0.016 | -0.021,-0.012 | <0.001*** | -0.015 | -0.019,-0.010 | <0.001*** |
|                               | Quartile 3 | 0.005  | 0.001,0.008   | 0.007**   | 0.003  | -0.001,0.006  | 0.11      |
|                               | Quartile 4 | 0.011  | 0.008,0.015   | <0.001*** | 0.008  | 0.005,0.012   | <0.001*** |
| <b>α-carotene</b>             |            |        |               |           |        |               |           |
|                               | Quartile 1 | -0.043 | -0.060,-0.026 | <0.001*** | -0.031 | -0.047,-0.014 | <0.001*** |
|                               | Quartile 3 | 0.019  | 0.006,0.031   | 0.005**   | 0.013  | 0.000,0.025   | 0.048*    |
|                               | Quartile 4 | 0.029  | 0.017,0.042   | <0.001*** | 0.022  | 0.010,0.034   | <0.001*** |
| <b>Selenium</b>               |            |        |               |           |        |               |           |
|                               | Quartile 1 | -0.01  | -0.014,-0.006 | <0.001*** | -0.010 | -0.014,-0.006 | <0.001*** |
|                               | Quartile 3 | 0.01   | 0.007,0.014   | <0.001*** | 0.010  | 0.006,0.014   | <0.001*** |
|                               | Quartile 4 | 0.018  | 0.014,0.022   | <0.001*** | 0.018  | 0.014,0.022   | <0.001*** |
| <b>Ferritin</b>               |            |        |               |           |        |               |           |
|                               | Quartile 1 | 0.000  | -0.002,0.002  | 0.89      | -0.001 | -0.003,0.001  | 0.26      |
|                               | Quartile 3 | 0.000  | -0.002,0.002  | 0.90      | 0.001  | -0.001,0.003  | 0.40      |
|                               | Quartile 4 | 0.000  | -0.002,0.001  | 0.67      | 0.001  | -0.000,0.003  | 0.15      |
| <b>Transferrin Saturation</b> |            |        |               |           |        |               |           |
|                               | Quartile 1 | 0.001  | -0.005,0.007  | 0.70      | 0.000  | -0.006,0.006  | 0.99      |
|                               | Quartile 3 | -0.002 | -0.007,0.004  | 0.57      | -0.001 | -0.007,0.005  | 0.78      |
|                               | Quartile 4 | -0.003 | -0.008,0.003  | 0.38      | -0.002 | -0.008,0.005  | 0.62      |
| <b>Calcium</b>                |            |        |               |           |        |               |           |
|                               | Quartile 1 | -0.192 | -0.347,-0.036 | 0.02*     | -0.411 | -0.578,-0.244 | <0.001*** |
|                               | Quartile 3 | 0.113  | -0.041,0.268  | 0.15      | 0.209  | 0.049,0.370   | 0.01*     |
|                               | Quartile 4 | 0.473  | 0.319,0.628   | <0.001*** | 0.592  | 0.428,0.756   | <0.001*** |
| <b>Lead</b>                   |            |        |               |           |        |               |           |
|                               | Quartile 1 | -0.026 | -0.050,-0.003 | 0.03*     | 0.004  | -0.020,0.028  | 0.75      |
|                               | Quartile 3 | 0.008  | -0.014,0.029  | 0.47      | -0.018 | -0.043,0.006  | 0.14      |
|                               | Quartile 4 | 0.030  | 0.010,0.051   | 0.003**   | -0.008 | -0.032,0.016  | 0.50      |

1. Abbreviations: CI = Confidence Interval; Lp(a) = Lipoprotein(a); LDL-C = Low-Density Lipoprotein Cholesterol; RBC = Red Blood Cell

2. \* = <0.05, \*\* = <0.01, \*\*\* = <0.001

3. Lp(a) quartiles: 1 = 0 to 5 mg/dL n=2083, 2= 6 to 18 mg/dL, n=1821, 3= 19 to 36 mg/dL, n=1850, 4 = 37 to 210 mg/dL, n=1908.

4. LDL quartiles: 1 = 1.8 to 91.1 mg/dL = n=1916, 2 = 91.1 to 114.6 mg/dL, n=1915, 3 = 114.6 mg/dL to 141.3 mg/dL, n=1916, 4 = 141.3 mg/dL to 364.9 mg/dL, n=1915.
